# To Lyse or Not to Lyse: Transient-Mediated Stochastic Fate Determination in Cells Infected by Bacteriophages

Richard I. Joh<sup>1</sup>, Joshua S. Weitz<sup>1,2\*</sup>

**1** School of Physics, Georgia Institute of Technology, Atlanta, Georgia, United States of America, **2** School of Biology, Georgia Institute of Technology, Atlanta, Georgia, United States of America

## Abstract

Cell fate determination is usually described as the result of the stochastic dynamics of gene regulatory networks (GRNs) reaching one of multiple steady-states each of which corresponds to a specific decision. However, the fate of a cell is determined in finite time suggesting the importance of transient dynamics in cellular decision making. Here we consider cellular decision making as resulting from first passage processes of regulatory proteins and examine the effect of transient dynamics within the initial lysis-lysogeny switch of phage  $\lambda$ . Importantly, the fate of an infected cell depends, in part, on the number of coinfecting phages. Using a quantitative model of the phage  $\lambda$  GRN, we find that changes in the likelihood of lysis and lysogeny can be driven by changes in phage co-infection number regardless of whether or not there exists steady-state bistability within the GRN. Furthermore, two GRNs which yield qualitatively distinct steady state behaviors as a function of phage infection number can show similar transient responses, sufficient for alternative cell fate determination. We compare our model results to a recent experimental study of cell fate determination in single cell assays of multiply infected bacteria. Whereas the experimental study proposed a “quasi-independent” hypothesis for cell fate determination consistent with an observed data collapse, we demonstrate that observed cell fate results are compatible with an alternative form of data collapse consistent with a partial gene dosage compensation mechanism. We show that including partial gene dosage compensation at the mRNA level in our stochastic model of fate determination leads to the same data collapse observed in the single cell study. Our findings elucidate the importance of transient gene regulatory dynamics in fate determination, and present a novel alternative hypothesis to explain single-cell level heterogeneity within the phage  $\lambda$  lysis-lysogeny decision switch.

**Citation:** Joh RI, Weitz JS (2011) To Lyse or Not to Lyse: Transient-Mediated Stochastic Fate Determination in Cells Infected by Bacteriophages. *PLoS Comput Biol* 7(3): e1002006. doi:10.1371/journal.pcbi.1002006

**Editor:** Claus O. Wilke, University of Texas at Austin, United States of America

**Received:** November 3, 2010; **Accepted:** December 22, 2010; **Published:** March 10, 2011

**Copyright:** © 2011 Joh, Weitz. This is an open-access article distributed under the terms of the Creative Commons Attribution License, which permits unrestricted use, distribution, and reproduction in any medium, provided the original author and source are credited.

**Funding:** This work was supported by the James S. McDonnell Foundation and the Defense Advanced Projects Research Agency under grants HR0011-05-1-0057 and HR0011-09-1-0055. Joshua S. Weitz, Ph.D. holds a Career Award at the Scientific Interface from the Burroughs Wellcome Fund. The funders had no role in study design, data collection and analysis, decision to publish, or preparation of the manuscript.

**Competing Interests:** The authors have declared that no competing interests exist.

\* E-mail: jsweitz@gatech.edu

## Introduction

Biochemical pathways and feedbacks in gene regulatory networks (GRNs) shape when and how much genes are expressed. Differential gene expression can lead to qualitative changes in cellular phenotypes, whether via alternative cell fate determination in unicellular organisms (e.g., competence [1], sporulation [2], persistence [3], and infected cell fate [4]) or via cell differentiation in multi-cellular organisms (e.g., lineage determination [5]). The steps leading to qualitative changes in phenotype are not strictly deterministic. Gene regulation is an inherently noisy process involving transcription control, translation, diffusion and chemical modifications of transcription factors, all of which may be characterized by stochastic fluctuations due to low copy numbers of regulatory molecules [6–8]. As a result, genetically identical cells can have marked differences in the state of regulatory molecules even when faced with identical environmental conditions [9–11]. Explanations for alternative cell fate determination generally presume the existence of multiple stationary states within the GRN [12,13]. Determination of cell fate is therefore usually described as the result of the interplay between noise and deterministic dynamics of GRNs which determines the relative frequency of each decision [12,14].

A potential problem with this explanation is that cellular decision making occurs within finite time. From a theoretical point of view, differences in asymptotic dynamics are not necessary for regulatory dynamics to reach markedly different transient states. The hypothesis that transient dynamics can drive cell fate determination has been suggested in the context of HIV-1 latency where a bistable response is observed despite the purported monostability of the GRN [15]. Here, we take a generalized approach to a similar problem by considering cell fate determination as the result of stochastic transient dynamics of a GRN. Our starting point is the fact that extrinsic variation can drive substantial differences in the transient state of regulatory molecules [16]. That is to say, ensembles of cells with the same initial state of regulatory molecules which are exposed to two different conditions can follow distinct transient trajectories on average. In such a case, gene expression will be characterized by an early period in which transient trajectories are unresolvable with respect to the stochastic noise and a middle period in which they are markedly different. However, we claim that such transient differentiation in regulatory state need not be accompanied by marked differences in asymptotic, i.e., steady-state, behavior. Instead, we hypothesize that alternative cell fate decisions can be mediated by first passage processes of regulatory molecules [17,18].

## Author Summary

Multicellular organisms, single-celled organisms, and even viruses can exhibit alternative responses to various internal and environmental conditions. At the cellular level, alternative fate determination is usually described as the result of the inherent bistability of gene regulatory networks (GRNs). However, the fate of a cell is determined in finite time suggesting the importance of transient dynamics to cellular decision making. Here, we present a quantitative gene regulatory model of how bacteriophages determine the fate of an infected bacterium. We find that increasing the number of infecting phages increases the chance of quiescent (i.e., lysogeny) vs. productive (i.e. lysis) viral growth, in agreement with prior studies. However, unlike previous theoretical studies, the bias in cell fate is a result of the transient divergence of stochastic gene expression dynamics. We compare and contrast our theoretical model with recent observations of cell fate measured at the single-cell level within multiply-infected cells. Predicted heterogeneity in cell fate is shown to agree with data when including a previously unidentified gene dosage compensation mechanism, which represents an alternative hypothesis to how multiple phages interact in influencing cell fate. Together, our results suggest the importance of quantitative details of transient gene regulation in driving stochastic fate determination.

We examine the effect of first passage processes in stochastic GRNs within the initial decision switch between lysis and lysogeny by phage  $\lambda$ . Bacteriophage  $\lambda$  is perhaps the simplest example of an organism with alternative developmental modes, which are quiescent (lysogenic) and productive (lytic) growth upon infecting *E. coli* cells [4,19–22]. Here we focus on how phage- $\lambda$ -infected cells are lysed or become lysogens as a function of the number of coinfecting phages (also known as the cellular multiplicity of infection denoted as  $\mathcal{M}$ ). Experimental infection assays have revealed that *E. coli* cells that are multiply infected tend to become lysogens whereas singly infected cells tend to be lysed [23,24]. The decision to lyse a cell or enter lysogeny is stochastic [25,26], and the fraction of lysogeny is a probabilistic function of the number of coinfecting phages and cell volume [27–29]. Cells that become lysogenic may later spontaneously induce leading to virion production and cell lysis. The stability of the lysogenic state has also been evaluated in light of first exit problems [30], many of whose concepts we adapt in the current model of the initial decision switch.

A significant advantage in modeling phage  $\lambda$  is that the core pathways of lysis-lysogeny have been studied extensively. Subsequent to infection, the repressors (CIs) bind cooperatively to adjacent operator sites [31], and cooperative binding can induce DNA loops which enhance the stability of the lysogenic state [32–34]. Early quantitative studies of the initial lysis-lysogeny decision utilized statistical thermodynamic models which described the dynamics of gene regulation by cooperative binding of CI [35,36]. Arkin *et al.* developed a fully stochastic model based on transcription, translation and protein interactions [25]. Whether cells were fated to lysis or lysogeny was ascribed to intrinsic stochasticity, whose complexity rendered it intractable for mathematical analysis. More recently, theoretical work has suggested that alternative decisions of lysis and lysogeny may be due to inherent bistability of the phage  $\lambda$  GRN with respect to changes in copy number concentration ( $\mathcal{M}$  divided by host cell volume) [28]. However, this model presumes that differences in

asymptotic dynamics lead to changes in cell fate, without considering stochastic effects in transient dynamics.

In this study, we demonstrate that biased alternative cell fate decisions are possible due to transient divergences within gene regulatory dynamics. As evidence, we develop and analyze a quantitative model of a GRN of phage  $\lambda$  based on empirical analyses of viral infection. Although the structure of the phage  $\lambda$  GRN is relatively well established, the quantitative values of most kinetic parameters involved in viral gene regulation remain either unknown or poorly constrained. We examine two sets of kinetic parameters close to consensus empirical estimates which we refer to as transiently divergent and asymptotically divergent, respectively. We show that the dynamics of the GRN with these parameter sets are similar shortly after phage infection but the asymptotic dynamics are qualitatively distinct as a function of viral genome concentration. Next, we compare the fraction of lysogeny as a function of viral genome concentration in the two parameter sets. Cell fate is determined via first passage processes of two regulatory proteins, Q and CI, corresponding to lysis and lysogeny, respectively (see Models). We find that equivalent responses of cell fate to changes in viral genome concentration can be obtained with either parameter set, suggesting caution must be applied in interpreting alternative cell fate determination as a hallmark of bistability. In the process, we also discuss how thresholds of first passage processes can change the fraction of lysogeny and the time scale of decisions. Finally, we compare model results with experimental data on cell fate outcomes from single cell assays [29]. We propose an alternative data collapse of the observed cell fate outcomes, consistent with a previously unidentified gene dosage compensation mechanism. We show that including gene dosage compensation at the mRNA level in our stochastic model of transient fate determination also leads to the form of data collapse observed in the single cell study. We conclude by discussing means to reconcile multiple competing hypotheses for observed heterogeneity in the phage  $\lambda$  GRN.

## Results

### Deterministic dynamics of qualitatively identical phage $\lambda$ decision switches can be asymptotically or transiently divergent

We first analyze a deterministic model of a GRN of phage  $\lambda$  (see Fig. 1, and Models Eq. (3)). Prior to phage  $\lambda$  infection, there are no viral proteins and mRNAs in the host cell. A cell can be infected by  $\mathcal{M}$  phages, which we vary one to five for a fixed cell volume. Cell fate, either lysis or lysogeny, is determined based on the first passages of a pair of fate-determining regulatory molecules, CI and Q (see Fig. 2 (B,E)). We model lysogeny as occurring when CI exceeds a concentration threshold and lysis as occurring when Q exceeds a concentration threshold. We set the value of these thresholds at 100 nM each, and explore the impact of varying these thresholds levels. Values of kinetic parameters necessary for modeling the lysis-lysogeny decision switch are known to within a few percent error in some cases, unknown in other cases, or have estimates with significant uncertainty (see Table 1). We chose two sets of parameters which are close to the consensus estimates, but that show markedly distinct asymptotic behaviors especially when  $\mathcal{M} = 1$ . GRNs with these two sets are asymptotically and transiently divergent, respectively (Fig. 2). We define a phage  $\lambda$  GRN with a set of kinetic parameters to be asymptotically divergent if each deterministic trajectory for  $\mathcal{M} = 1, 2, \dots, 5$  crosses the CI and Q thresholds only once. Otherwise, a GRN is referred to as transiently divergent.

The transient dynamics for the phage  $\lambda$  GRN given either parameter set (either asymptotically or transiently divergent) are

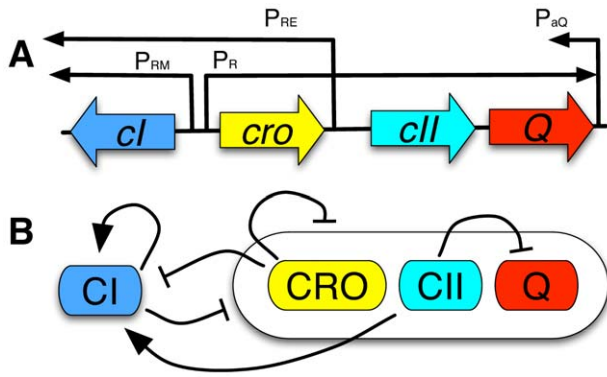

**Figure 1. Core genetic components of lysis-lysogeny decision switch in phage  $\lambda$ .** (A) Schematic diagram of genes and promoters. CI and CRO dimers are the transcription factors for  $P_{RM}$  and  $P_R$  while  $P_{RE}$  and  $P_{aQ}$  is controlled by CII tetramers. Black arrows represent open reading frames of promoters when activated ( $R_R$ ,  $P_{RM}$  and  $P_{RE}$ ) and antisense transcript  $\lambda aQ$ . (B) Interactions among gene products. Regular and blunt arrows represent positive and negative feedbacks, respectively. CI dimers are self-activators while repressing the other genes, and CRO dimers repress all the genes in the system. CII tetramers activate *cl* transcription, and suppress Q expression by transcribing antisense mRNAs.  
doi:10.1371/journal.pcbi.1002006.g001

similar during the time scale of lysis-lysogeny decision ( $<100\text{min}$ ). The asymptotically divergent phage  $\lambda$  GRN exhibits lysis for  $\mathcal{M}=1$  and lysogeny when  $\mathcal{M}>1$ . Note that the ratio between CI and Q changes dramatically as a function of  $\mathcal{M}$  from having far more Q to having far more CI at steady state. Only when  $\mathcal{M}=1$  are there two possible steady states, but the initial condition leads to lysis (Fig. 2 (A)). In contrast, the transiently divergent GRN is monostable for all values of  $\mathcal{M}$  that we considered. Further, the steady-state CI and Q concentrations have far greater levels of CI than Q, suggesting that an asymptotic analysis would suggest that the transiently divergent GRN would always lead to lysogeny. However, note that when  $\mathcal{M}=1$ , Q increases rapidly, exceeds the threshold for lysis, and only later does it drop down and approaches a case where Q is low and CI is high (Fig. 2 (D-F)). Thus, there is an inconsistency between expectations for cell fate determination as viewed in finite time vs. that viewed asymptotically.

**Alternative cell fates as determined by transient viral gene regulation**

The initial lysis-lysogeny decision of phage  $\lambda$  is sensitive to the external conditions of  $\mathcal{M}$  and cell size. Empirical analyses have shown this decision to be highly stochastic with the fraction of lysogeny between 20% and 90% for physiologically relevant  $\mathcal{M}$  and cell size [29]. To model the stochastic nature of this decision,

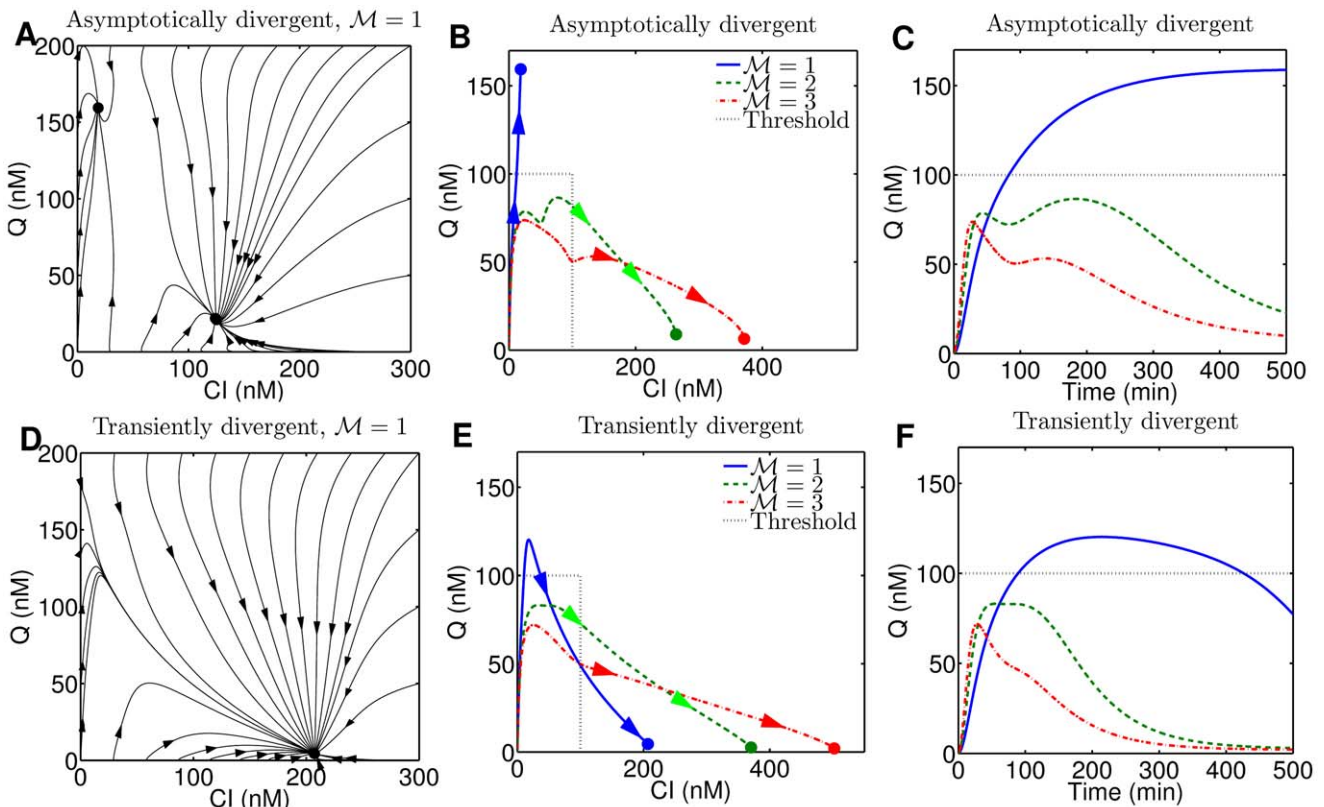

**Figure 2. Dynamics of regulatory proteins, CI and Q, when the GRN is asymptotically divergent and transiently divergent.** (A) Phase diagram of CI-Q dynamics when asymptotically divergent for  $\mathcal{M}=1$ . Note that the system is bistable. (B) Phase diagram of CI-Q dynamics starting from no viral proteins when asymptotically divergent. Thresholds of CI and Q (both at 100 nM) represent the concentrations above which decisions are lysogenic and lytic, respectively. Trajectories cross the threshold only once. (C) Asymptotically divergent dynamics of Q concentration as a function of time. (D) Phase diagram of transiently divergent system with  $\mathcal{M}=1$ . Note that the system is not bistable. (E) Phase diagram of CI-Q dynamics of the transiently divergent phage  $\lambda$  GRN. At  $\mathcal{M}=1$  the deterministic trajectory crosses the threshold three times, and decisions change from lysis to lysogeny as a function of time. (F) Transiently divergent Q dynamics.  
doi:10.1371/journal.pcbi.1002006.g002

**Table 1.** Parameters for transiently divergent and asymptotically divergent GRNs.

| Parameter     | Reference value                          | Reference            | Asymptotically divergent | Transiently divergent |
|---------------|------------------------------------------|----------------------|--------------------------|-----------------------|
| $\gamma_x$    | 0.01(min <sup>-1</sup> )                 | ≈ 0 [66], 0.042 [25] | 0.014                    | 0.013                 |
| $\gamma_y$    | 0.06(min <sup>-1</sup> )                 | 0.016 [67]           | 0.033                    | 0.056                 |
| $\gamma_z$    | 0.10(min <sup>-1</sup> )                 | 0.16 w/o CIII [68]   | 0.13                     | 0.22                  |
| $\gamma_q$    | 0.01(min <sup>-1</sup> )                 |                      | 0.0095                   | 0.016                 |
| $\gamma_m$    | 0.1(min <sup>-1</sup> )                  | 0.12 [69]            | 0.1                      | 0.1                   |
| $\alpha_x$    | 0.06(min <sup>-1</sup> )                 | 0.06 [36]            | 0.055                    | 0.055                 |
| $\alpha_y$    | 0.84(min <sup>-1</sup> )                 | 0.84 [36], 3 [66]    | 0.82                     | 0.70                  |
| $\alpha_z$    | 0.8(min <sup>-1</sup> )                  | < $\alpha_y$         | 0.50                     | 0.83                  |
| $\alpha_q$    | 0.75(min <sup>-1</sup> )                 | < $\alpha_z$         | 0.78                     | 0.63                  |
| $\beta_x$     | 0.66(min <sup>-1</sup> )                 | 0.66 [36], 3.42 [70] | 0.79                     | 0.88                  |
| $\delta_x$    | 0.9(min <sup>-1</sup> )                  | 0.9 [25]             | 1.24                     | 0.93                  |
| $\delta_{aQ}$ | 2(min <sup>-1</sup> )                    |                      | 3.1                      | 3.8                   |
| $c_d^x$       | 0.05(nM <sup>-1</sup> )                  | 0.05 [71], 0.18 [72] | 0.060                    | 0.079                 |
| $c_d^y$       | 5.8(nM <sup>-1</sup> )                   | 5.8 [73], 307 [74]   | 4.6                      | 6.7                   |
| $c_d^z$       | 0.05(nM <sup>-1</sup> )                  |                      | 0.065                    | 0.020                 |
| $c_t^z$       | 0.05(nM <sup>-1</sup> )                  |                      | 0.093                    | 0.068                 |
| $c_p^{aQ}$    | 0.2(nM <sup>-1</sup> )                   |                      | 0.14                     | 0.10                  |
| $\sigma$      | 0.5(min <sup>-1</sup> )                  |                      | 0.38                     | 0.47                  |
| $\zeta$       | 0.1(nM <sup>-1</sup> min <sup>-1</sup> ) | 0.02 [75]            | 0.15                     | 0.068                 |
| $V$           | 1(μm <sup>3</sup> )                      | 0.5 ~ 2.0            |                          |                       |

doi:10.1371/journal.pcbi.1002006.t001

we assume that first passage processes of CI and Q determine whether lysis or lysogeny occurs in an infected cell. Lysogeny occurs if CI reaches its critical concentration before Q does. Lysis occurs if the opposite holds true. We follow the approach of Arkin *et. al.* [25] and run fully stochastic simulations of the phage λ GRN while setting both lytic and lysogenic thresholds at 100nM (see Models). We assume that reaching a decision of lysis or lysogeny brings a topological change to the GRN. Thus, we stop the dynamics at the time of a decision since our phage λ model cannot describe the post-decision regulatory dynamics. Fig. 3 depicts a subsample of trajectories in the phase space of CI-Q labeled according to which decision is reached via a first passage process. Note that there is a delay for CI to be expressed since sufficiently abundant CII is required for initial CI expression. In contrast, Q can be produced immediately after phage infection. When the host is singly infected, lysis is the dominant decision, and CI does not build up until a significant amount of Q is produced (Fig. 3 (A)). At higher M (M=2 for Fig. 3 (B)), CII and Q are produced at a higher rate. Depending on the CII expression level Q can be repressed while CI becomes active which leads to lysogeny. In comparison to the deterministic dynamics described in the previous section, there is significant variability in the lysis-lysogeny bias of the GRN, though the bias itself is affected by changes in M and cell volume (as described in the next section).

**Probability of lysogeny is an increasing function of phage genome concentration**

We vary the volume of host cells (denoted as V) as well as M in order to investigate how cell fate responds to changes in the concentration of viral genomes (M/V). For consistency with

experimental studies and to model physiologically reasonable values, we vary M from one to five, and vary V from 0.5 to 2 μm<sup>3</sup>. Fig. 4 shows the fraction of lysogeny as a function of phage genome concentration. Regardless of bistability in the phage λ GRN, we find that first passage mediated decision making can lead to systematic biases in alternative cell fate determination. Phages preferentially enter lysogeny when multiple phages infect the same hosts while singly infected hosts tend to be fated for lysis. The relative frequencies of lysis or lysogeny can be collapsed as a function of an extrinsic parameter M/V. Our results match the general trend of recent experimental observations which demonstrated that the fraction of lysogeny goes up as phage genome number increases or cell volume decreases [27,29]. Importantly, the functional responses to phage genome concentration are nearly indistinguishable even for two parameter sets which have qualitatively different asymptotic dynamics (Fig. 4 and Fig. 2 (B,E)). The biased decision response as a function of phage genome concentration is due to the similarity of transient dynamics, irrespective of asymptotic dynamics that could have been followed. Hence, the finding that infected cell fate can change from predominantly lytic (at M=1) to predominantly lysogenic (at M>2) is not necessarily a hallmark of an underlying bistable viral GRN nor of a bifurcation in the underlying dynamics as a function of M or M/V. Despite the agreement with prior empirical studies, note that our model does not predict systematic decreases in the lysogen fraction given a fixed value of M/V and increasing values of M, as observed in a recent single-cell experimental study [29]. In the next section, we revisit the experimental data from Zeng *et. al.* [29] and in so doing, provide an alternative data collapse and a corresponding mechanism that is consistent with a modified version of the current stochastic model.



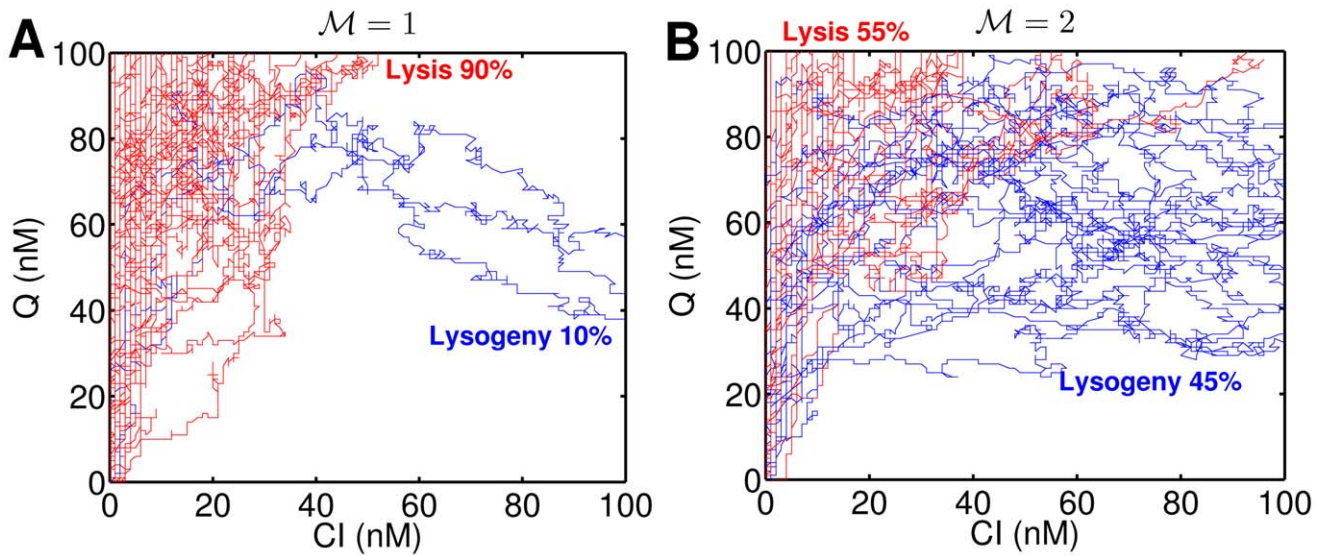

**Figure 3. Stochastic realization of C and Q dynamics for (A)  $\mathcal{M}=1$  and (B)  $\mathcal{M}=2$ .** Trajectories are sampled for every 1/4 minute. The system is transiently divergent, and thresholds are set at 100 nM for both Cl and Q. Each curve represents a single realization, and 50 realizations are shown here. Red trajectories indicate that decisions are lytic whereas blue ones represent lysogeny. doi:10.1371/journal.pcbi.1002006.g003

**Mechanism of partial gene dosage compensation accounts for observed heterogeneity in lysis-lysogeny decisions**

Zeng *et al.* [29] measured the fate of multiply infected cells in which the number of phages and cell volume could be measured on a per-cell basis. The experimental protocol induces viral injection with an abrupt change in temperature and hence, infections are treated as simultaneous. The experimental data demonstrate that the fraction of lysogeny increases with viral concentration,  $\mathcal{M}/V$  (Fig. 5 (A)). This trend agrees with prior

experimental works showing that increases in co-infection number increases the likelihood of lysogeny [23,24] and that increases in cell volume increases the likelihood of lysogeny [27]. However, there is significant amount of heterogeneity in the observed cell fate data other than strict dependence on  $\mathcal{M}/V$  as suggested by theory [28].

In particular, Zeng *et al.* [29] observed that the fraction of lysogens decreases with increasing  $\mathcal{M}$  for a given ratio of  $\mathcal{M}/V$ . Zeng *et al.* [29] suggested that the remaining heterogeneity in cell fate not explained by a strict dependence on  $\mathcal{M}/V$  is due to a

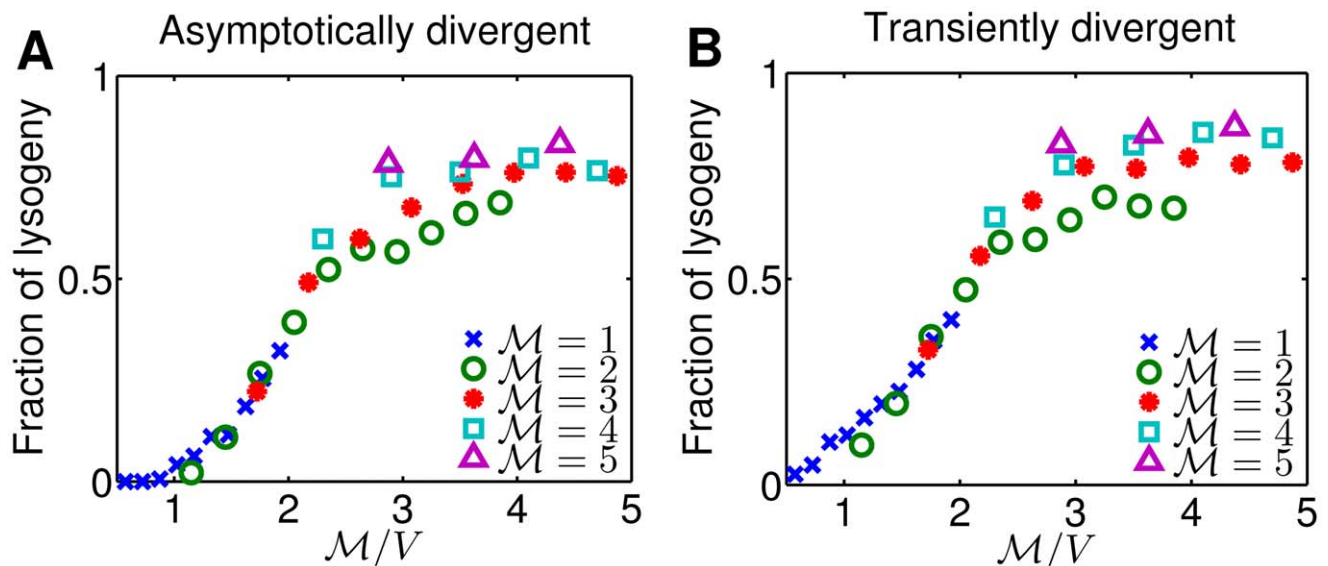

**Figure 4. Response of phage  $\lambda$  to various phage genome concentrations when (A) asymptotically divergent and (B) transiently divergent.**  $\mathcal{M}$  and  $V$  represent the number of coinfecting phages and the host cell volume, respectively, so  $\mathcal{M}/V$  is the phage genome concentration. Each point is the result from 5,000 simulations. doi:10.1371/journal.pcbi.1002006.g004

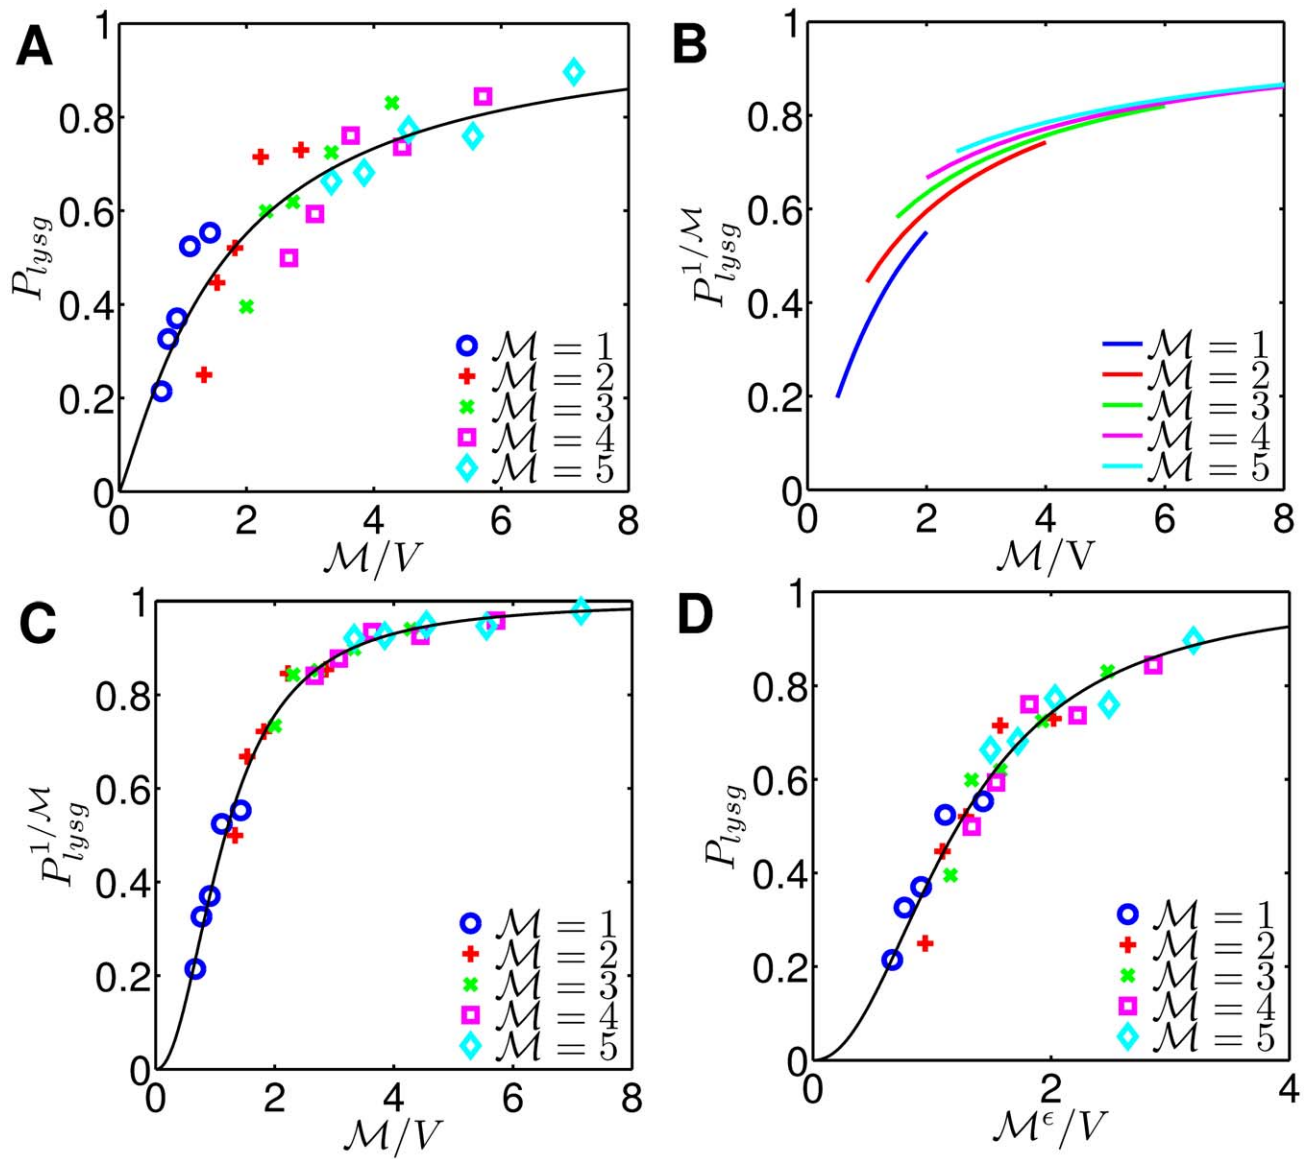

**Figure 5. Alternative mechanisms underlying heterogeneity of lysis-lysogeny decisions.** (A) Fraction of lysogeny plotted from single cell assays[29]. (B) Rescaled probability of  $f(1/V)^{1/M}$ . Each phage within a host is completely independent from other phages, and decision of lysogeny becomes a function of host volume. Note that rescaled curves do not collapse into a single curve. (C) Rescaled probability of  $f(M/V)^{1/M}$  proposed by Zeng *et al.* [29] representing the probability of lysogeny for each individual infecting phage. Each phage independently “chooses” lysis or lysogeny. However, since the fraction of lysogeny for a single phage is a function of  $M/V$ , phages sense the presence of other phages. Note that data from different  $M$ -s collapse into a single curve. (D) Probability of lysogeny plotted against rescaled  $M^\epsilon/V$  when  $\epsilon=0.5$ , corresponding to a mechanism in which gene expression from multiple copies is partially compensated. Due to partial dosage compensation, the transcription rate is not linearly proportional to  $M$ , and the effective copy number is given as  $M^\epsilon$  where  $0 \leq \epsilon \leq 1$ . Note that the data from different  $M$ -s collapse into a single curve. Black lines represent nonlinear curve fits into Hill functions.  
doi:10.1371/journal.pcbi.1002006.g005

voting mechanism that takes place at the single-cell level. In this view, a unanimous decision of phages is required by phages for lysogeny [29] (presumably because a single phage that is fated to lysis would over-ride a decision by other phages for lysogeny). If each coinfecting phage is totally independent from each other, then one would expect the probability of lysogeny to be:

$$P_{lysg}(M, V) = f(1/V)^M, \tag{1}$$

where  $f(1/V)$  is the probability that a cell of volume  $V$  infected by a single phage would become a lysogen. Fig. 5 (B) shows the

fraction of lysogeny scaled with  $1/M$  power based on the empirical observations for the singly infected case. The re-scaled data for the five values of  $M$  should agree with  $f(1/V)$  in an independent phage voting model. However, this rescaling does not form a single line. This suggests that there might be some interdependence between phages.

Indeed, the voting model proposed by Zeng *et al.* [29] is actually a “quasi-independent” voting model. In this view, a unanimous decision of phages is required by phages for lysogeny [29]. However, the probability that any given phage decides for lysogeny becomes a function of the viral genome concentration,  $M/V$ . Thus the fraction of lysogeny becomes

$$P_{lysg}(\mathcal{M}, V) = f_1(\mathcal{M}/V)^{\mathcal{M}}. \quad (2)$$

where  $f_1(\mathcal{M}/V)$  is the probability that a single phage reaches a lysogenic decision state given that it is in a cell of volume  $V$  with a total of  $\mathcal{M}$  phages. The re-scaled probability of entering lysogeny at the whole cell level,  $P_{lysg}^{1/\mathcal{M}}$ , is shown in Fig. 5 (C). Notably, the re-scaled experimental data collapses on a single line, presumably  $f_1(\mathcal{M}/V)$ . Thus, this mechanism captures the characteristics of experimental data phenomenologically. However, the mechanism involves both independence and inter-dependence among phage genomes that remains un-identified at the subcellular level.

Here, we revisit the cell fate data of Zeng *et al.* [29] and propose a mechanism of partial gene dosage compensation as an alternative explanation for the scaling collapse they observe. In this context, partial gene dose compensation means that a cell with multiple copies of a viral genome has smaller per-copy viral gene expression than a cell with a single viral genome. Indirect support already exists for this hypothesis. For example, Zeng *et al.* [29] showed that the fraction of cells with halted growth increases with the number of co-infections, suggesting that viral genomes have adverse effects on cellular metabolism in addition to or instead of lysis. Earlier studies showed that phage  $\lambda$  infections repress host synthesis activity at the level of transcription [37] and translation [38]. The degree of repression depends on the number of coinfections, and more coinfections lead to greater repression. Broadly speaking, the mechanism (or mechanisms) underlying gene dosage compensation remains an open question. However, it has been widely noted that copy numbers of genes and chromosomes can differ among cells and individuals, but the resulting gene expression need not be a linear function of gene copy number [39–41].

Here, we assume that partial gene dosage compensation occurs at the level of transcription. Specifically, we assume that the total

transcription rate of a gene is proportional to  $\mathcal{M}^\epsilon$  where  $0 \leq \epsilon \leq 1$  (see Models and Eq. (3)).  $\epsilon$  is the quantitative measure of partial gene dosage compensation and RNA synthesis repression by phage genomes. When  $\epsilon=0$ , increases in viral genome have no effect on transcriptional rates, whereas when  $\epsilon=1$ , transcriptional rates increase linearly with  $\mathcal{M}$  (as in the original model described previously in this paper). Hence, if a partial gene dosage mechanism is at work, then the lysogeny data should collapse when plotted against  $\mathcal{M}^\epsilon/V$ . Fig. 5 (D) shows the fraction of lysogeny against  $\mathcal{M}^\epsilon/V$  which incorporates the effect of partial gene dosage compensation. Note that the data collapses into a single line, similar to the quasi-independent decision mechanism. The estimate of  $\epsilon$  from experimental data is about 0.5, suggesting that the overall viral transcriptional activity in the host cells on a per-viral genome basis scales with  $1/\sqrt{\mathcal{M}}$ .

Hence, two distinct mechanisms: (i) quasi-independent decision making; and (ii) partial gene dosage compensation, can explain heterogeneous decision making from single cell assay based experiments using data collapse. Note that we cannot evaluate the quasi-independent mechanism using our model because doing so would require incorporating genome-specific changes (such as anti-termination events) or compartmentalizing the cell with respect to transcription and translation events (requiring even more unknown parameters than the current model). However, it is possible to explicitly incorporate partial gene dosage compensation in stochastic simulations (see Models). In brief, we modified transcriptional rates so that transcription increased with  $\mathcal{M}^\epsilon$  instead of  $\mathcal{M}$  and ran stochastic simulations with all other parameters as before. Fig. 6 shows the fraction of lysogeny resulting from the stochastic fate determination model incorporating partial gene dosage compensation against  $\mathcal{M}/V$  and rescaled  $\mathcal{M}^\epsilon/V$ . Stochastic simulations with partial dosage compensation exhibit the heterogeneous, yet strong dependence of lysogeny on  $\mathcal{M}/V$ . Moreover, the cell fate results of stochastic simulations collapse into a single line when  $\mathcal{M}/V$  is rescaled as

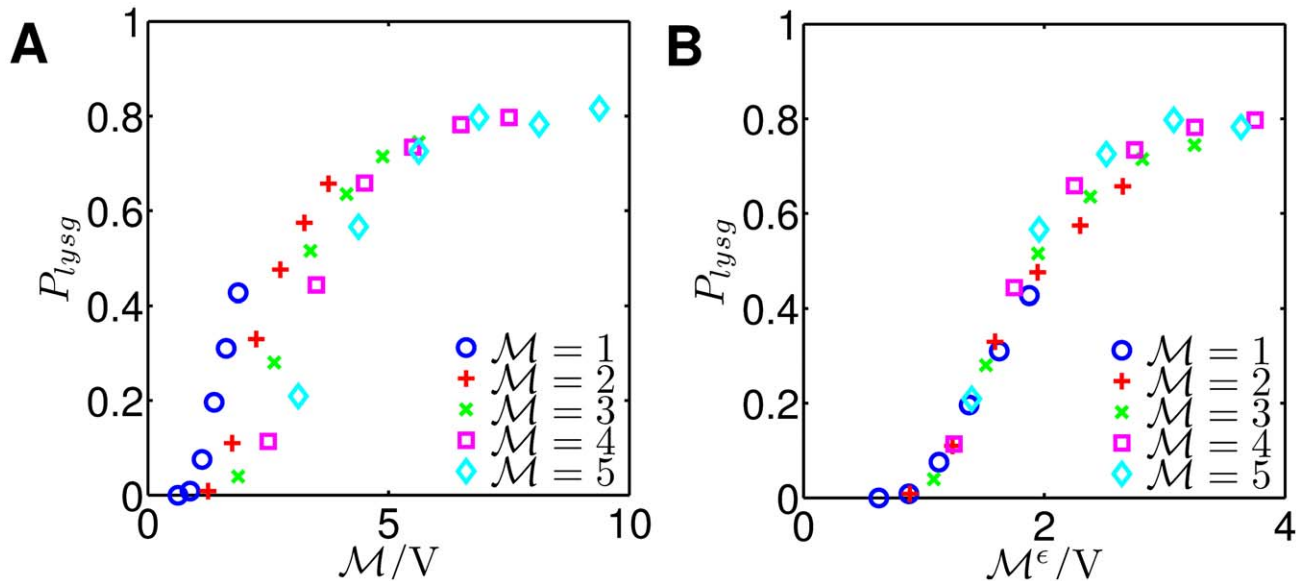

**Figure 6. Effect of gene dosage compensation from stochastic simulations.** (A) Fraction of lysogeny from stochastic simulations. Simulations with partial dosage compensation exhibit the nested pattern of  $\mathcal{M}/V$  dependence as seen in the experimental data (see Fig. 5). (B) Simulation results on the fraction of lysogeny from Fig. 6 (A) plotted with rescaled  $\mathcal{M}^\epsilon/V$  when  $\epsilon=0.5$ . The outcome of stochastic simulations with partial dosage compensation is consistent with experimental data (see Fig. 5 (A,D)). In this case, the GRN is asymptotically driven with CI and Q threshold at 100 nM and 120 nM, respectively, all other parameters are set according to Table 1 - transiently divergent. Each point is the result from 3,000 simulations.

doi:10.1371/journal.pcbi.1002006.g006

$\mathcal{M}^e/V$ . Given the new scaling collapse, cells with the same  $\mathcal{M}^e/V$  have a lower chance of lysogeny given increasing values of  $\mathcal{M}$ , consistent with the pattern observed in the experimental study (Fig. 5 (D)). Hence, we propose that partial gene dosage compensation should be considered as an alternative mechanism to explain the heterogeneous cell fate of bacteria infected by bacteriophage  $\lambda$ .

## Discussion

In this paper, we have proposed and analyzed a transient mechanism of cell fate determination in terms of first passage processes of regulatory proteins. We applied this mechanism to the study of the initial lysis-lysogeny decision in bacterial cells infected by phage  $\lambda$ . We found that stochastic simulation of parametrized viral GRNs lead to changes in the the frequency of alternative fates for infected cells, either lysis or lysogeny, as a function of the genome concentration of infecting viruses. The biased response in cell fate outcome occurs despite intrinsic noise in the system and does not require the bistability of the underlying GRN. Hence, alternative and seemingly adaptive cell fate decisions may be due to transient divergence in stochastic trajectories of regulatory molecules and not necessarily due to underlying bistability. Finally, we showed that a partial gene dosage compensation is a candidate mechanism underlying noise in lysis-lysogeny decisions, as supported by both our quantitative model and experimental data.

Our central result is in contrast to the conventional perspective that multistability is required for alternative decisions [13,14]. Multistability often requires cooperative binding as a necessary condition for the emergence of the two or more stable steady states in the GRN [42,43]. A recent study showed that a switch system can arise in the absence of cooperative bindings [44]. Our study suggests that cooperative binding may occur and affect transient dynamics but not necessarily lead to bistability in asymptotic dynamics. Together these results suggest that GRNs which do not have bistability or cooperative bindings might be able to lead to alternative cell fate determinations. Thus, it might be possible for a GRN to evolve (by natural selection) or to be designed (via synthetic means) to perform a complex task of alternative decision making in response to external stimuli without multistability. Note that such a transiently excitable GRN which differentiates transient and asymptotic phenotypes was experimentally demonstrated in *Bacillus subtilis* [45]. Generally, there exist examples of GRNs which are responsive to environmental signals and robust to changes of kinetic parameters [46] while other are sensitive to kinetic parameters. Sensitivity of transient dynamics to a GRN's kinetic parameters and thresholds might be a target of selection over evolutionary time scales. In this context, we examined how modifying thresholds for decisions can lead to systematic changes in lysis vs. lysogeny as well as decision times (see Fig. S2). The general result from the present analysis is that alternative determination requires separation of thresholds, which comes at the expense of slower decisions. Hence, transiently driven cellular decisions have the potential to be highly evolvable.

As we have detailed, stochastic simulations of the phage GRN proposed here can reproduce a number of characteristics for how the fraction of lysogeny changes with  $\mathcal{M}$  and cell volume. Importantly, we find that lysogeny increases with increasing  $\mathcal{M}$  [23,24] and decreasing cell volume [27], and remains between approximately 20%–90% for physiologically reasonable values [29]. The bias in cell fate outcome in favor of lysogeny with increasing  $\mathcal{M}$  may be adaptively significant. On average, high  $\mathcal{M}$  implies that phages infect hosts frequently on the time-scale of decision-making and further, that phages are more abundant than

their bacterial hosts. Lysis will further increase the phage-host ratio, and a previous study has speculated that phages seem to avoid depletion of hosts by entering lysogeny predominantly at high  $\mathcal{M}$  [47]. However, if lysogeny is adaptively favorable at high  $\mathcal{M}$ , why is it that a small fraction of phages still enter the lytic pathway? The answer could be due to constraints in the resolvability of the GRN due to the strength of intrinsic stochasticity in the GRN [29]. Or the stochasticity itself may be adaptive. Phages may have evolved to respond to changes in intracellular phage genome concentration in order to minimize the chance of extinction [48] by maintaining phage and lysogen population as a bet-hedging strategy [49]. Any such speculations require careful consideration of selective pressures imparted by ecological dynamics, game theoretic issues arising from co-infections by non-identical strains, and biophysical constraints and trade-offs arising at the intracellular scale [50].

However, the first set of stochastic simulations of the phage GRN presented in this manuscript fail to predict the systematic decrease in the fraction of lysogeny given a fixed value of  $\mathcal{M}/V$  and increasing values of  $\mathcal{M}$  [29] (see Fig. 4). We revisited the original single-cell data and demonstrated the existence of an alternative scaling collapse owing to a proposed partial gene dosage compensation mechanism. When we incorporate partial gene dosage compensation within our stochastic model, we are able to recover the alternative scaling collapse consistent with the empirical measurements of Zeng *et al.* [29] (see Fig. 5(D) and 6(B)). What might cause partial dosage compensation to occur in multiple infected cells? In stochastic simulations here, dosage compensation is modeled explicitly at the transcriptional level, whereas in reality multiple factors can contribute to it, and may occur at both transcriptional and post-transcriptional levels. The degree of compensation might change depending on copy numbers of genes and chromosomes as well as other intracellular factors. Copy number variation (CNV) is common in biological organisms [51,52], and previous studies suggested that gene expression can depend sensitively on CNV when uncompensated [53]. Indeed, one hypothesis is that gene regulatory networks have been selected for their lack of dosage sensitivity to avoid problems in gene expression that may arise when CNV occurs naturally [54]. Previous studies showed that phage  $\lambda$  represses overall activity of RNA and protein synthesis within infected hosts depending on the number of coinfections [37,38]. Viruses are known to control host cell cycle in eukaryotic cells [55], but how viruses affect the overall host transcriptional and translational activity in bacterial hosts is an open question. We believe that elucidating intracellular mechanisms of gene dosage compensation would be an important step toward understanding CNV and its resulting change in gene expression, at both the transient and steady state. In doing so, we also hope to provide a cautionary note: deducing explicit mechanisms from data collapses can be difficult, particularly when multiple data collapse schemes are consistent with observations.

In summary, this study proposed a novel intracellular decision-making mechanism to explain the variability in cell fate determination in multiply infected hosts. However, there can be other sources of variability underlying the lysis-lysogeny decision switch. First, the viral concentration,  $\mathcal{M}/V$ , in naturally infected hosts may be dynamic. Multiple phages infect a host sequentially, and a host can keep growing while being infected. Subsequent infections increase  $\mathcal{M}$  over time, and infected cells may spend a substantial fraction of the time prior to cell fate determination with a value of  $\mathcal{M}$  which is smaller than the final  $\mathcal{M}$ . Next, host cell growth decreases  $\mathcal{M}/V$  whereas viral genome replication increases  $\mathcal{M}/V$  during the infection cycle. Clearly the dynamic



nature of viral genome concentration needs to be addressed even if experimental protocols have been designed to synchronize infections. Second, despite our incorporation of stochasticity in the model, we assume the bacterial cytoplasm is well-mixed. Previous studies demonstrated that bacterial DNA, RNA and proteins have spatial patterns [56–58]. Bacteriophages are known to target cellular poles of hosts preferentially [59] which suggests phage genomes might be localized within bacterial cytoplasm. Hence, cell fate decision may be determined by local concentrations of regulatory proteins and quasi-independent cell fate determination by each virus. Finally, we assumed decision making as strict first passage processes arising from the consideration of thresholds as absorbing states within a GRN dynamics. It is possible that decision making involves soft thresholds over which cells make decisions with some probability. There are studies which show duration of signals is critical to cellular decisions [60,61], and there might be some minimum time interval during which the system is above a threshold to make a decision [62]. Even if experimental protocols can minimize the impact of one of these mechanisms, the evolution of the phage  $\lambda$  GRN would surely be impacted by all of them. Progress in identifying the importance of each of these issues at the molecular and evolutionary scales is relevant not only to the study of transient fate determination in phage  $\lambda$ , but to the study of cellular decision making in general.

### Models

#### Gene regulation in phage $\lambda$

The fate of *E. coli* cells infected by phage  $\lambda$  are decided soon after infection by a set of so-called early viral genes [4]. Among them we consider four genes, *cI*, *cro*, *cII* and *Q*, and one antisense mRNA (*aQ*) (see Fig. 1 (A)). The expression of these genes are controlled by four promoters,  $P_R$ ,  $P_{RM}$ ,  $P_{RE}$  and  $P_{aQ}$ .  $P_R$  and  $P_{RM}$  share three operator sites which are targeted by CI and CRO. The natural form of CI is a dimer, and CI dimers act as self activators and repressors for other genes by binding to  $P_R/P_{RM}$ . CII tetramers can bind to  $P_{aQ}$  to transcribe *aQ* mRNA and  $P_{RE}$  to produce CI [63]. Dimers of CRO bind to  $P_R/P_{RM}$  to inhibit all the genes in the system (Fig. 1 (B)).

Immediately after phage infections there are no viral gene products. At this initial stage  $P_R$  is active which leads to an increase of CRO, CII and Q levels. If Q becomes sufficiently abundant, it will turn on genes which make progeny phages, and the infected host will be lysed. However, as CII concentration increases CII tetramers can activate CI transcription from  $P_{RE}$ , and CI expression level become further enhanced by the positive feedback loop of CI at  $P_{RM}$ . CII also represses Q by transcribing *aQ* which facilitates Q mRNA degradation, and sufficiently high CI level leads to lysogeny [4]. Hence, lysis or lysogeny is determined based on which of either CI and Q reaches the threshold concentration first. When CI reaches its threshold, CI dimers begin to form tetramers and octamers which lead to DNA looping [64]. DNA looping is very stable while maintaining lysogeny and repressing genes which trigger lysis [34]. When Q reaches its threshold, a group of late genes responsible for making progeny phages will be turned on, and the host will eventually be lysed. Since translation occurs with a single protein at a time, simultaneous crossings of lytic and lysogenic thresholds are forbidden, and the decisions are mutually exclusive. In reality, decisions would not be triggered by infinitesimally short bursts over decision thresholds, but for simplicity we assume a decision is made when either CI or Q concentration reaches its threshold for the first time. The use of step functions instead of Hill function type responses has been used extensively in the study of

quantitative gene regulatory networks [16]. Note that when phages multiply infect cells in natural settings, they do not do so simultaneously, and so  $\mathcal{M}$  increases sequentially in time. However, for simplicity we only consider simultaneous coinfections, for which  $\mathcal{M}$  becomes a parameter in determining cell fate rather than a dynamic variable. This choice of modeling simultaneous infections is also motivated by the the experimental protocol of Zeng *et. al.* [29] in which rapid temperature changes were used to synchronize phage infection of DNA into host genomes.

#### Quantitative model of phage $\lambda$ decision switch

Here we express the interactions among *cI*, *cro*, *cII* and *Q* as well as *aQ* mRNA described in the previous section as a set of ordinary differential equations. If we apply quasi-steady-state approximation for dimers and tetramers, the system can be described as

$$\begin{aligned}
 [cI \text{ mRNA}] \frac{dm_x}{dt} &= \frac{\mathcal{M}}{V} \alpha_x f_{RM}^{basal} + \frac{\mathcal{M}}{V} \beta_x f_{RM}^{act} + \frac{\mathcal{M}}{V} \delta_x f_{RE} - \gamma_m m_x, \\
 [cro \text{ mRNA}] \frac{dm_y}{dt} &= \frac{\mathcal{M}}{V} \alpha_y f_R - \gamma_m m_y, \\
 [cI \text{ I mRNA}] \frac{dm_z}{dt} &= \frac{\mathcal{M}}{V} \alpha_z f_R - \gamma_m m_z, \\
 [Q \text{ mRNA}] \frac{dm_Q}{dt} &= \frac{\mathcal{M}}{V} \alpha_Q f_R - \gamma_m m_Q - \zeta m_Q m_{aQ}, \\
 [aQ \text{ mRNA}] \frac{dm_{aQ}}{dt} &= \frac{\mathcal{M}}{V} \delta_{aQ} f_{aQ} - \gamma_m m_{aQ} - \zeta m_Q m_{aQ}, \\
 [CI] \frac{dX}{dt} &= \sigma m_x - \gamma_x X, \\
 [CRO] \frac{dY}{dt} &= \sigma m_y - \gamma_y Y, \\
 [CII] \frac{dZ}{dt} &= \sigma m_z - \gamma_z Z, \\
 [Q] \frac{dQ}{dt} &= \sigma m_Q - \gamma_Q Q, \tag{3}
 \end{aligned}$$

where  $X$ ,  $Y$ ,  $Z$  and  $Q$  represent the total concentration of CI, CRO, CII and Q, respectively.  $\mathcal{M}$  represents the number of coinfecting phages while  $V$  is the cell volume.  $m$  represents the mRNA concentration, and  $\gamma$  denotes the degradation rate where each subscript represent the species of associated gene/protein.  $Q$  and *aQ* mRNA become degraded by binding to each other and the adsorption rate is denoted as  $\zeta$ .  $\alpha$ ,  $\beta$  and  $\delta$  represent the basal, CI-mediated and CII-mediated transcription rates with subscripts indicating the species of mRNA. Note that  $\alpha$ ,  $\beta$  and  $\delta$  is inversely proportional to  $V$  since the concentration change by a transcription event is proportional to  $1/V$ . We assume that the concentrations of dimers and tetramers are at quasi-steady states such as

$$\begin{aligned}
 X &= x_1 + 2x_2 = x_1 + 2c_d^x x_1^2, \\
 Y &= y_1 + 2y_2 = y_1 + 2c_d^y y_1^2, \\
 Z &= z_1 + 2z_2 + 4z_4 = z_1 + 2c_d^z z_1^2 + 4c_t^z c_d^z z_1^4, \tag{4}
 \end{aligned}$$

where the subscripts 1, 2 and 4 represent the concentration of monomers, dimers, and tetramers of each respective protein.  $c_d$  and  $c_t$  are the dimerization and tetramerization constants,

respectively.  $f_R$ ,  $f_{RM}$ ,  $f_{RE}$  and  $f_{aQ}$  in Eq. (3) denote the probability of transcribable configurations for each promoters based on free energy change of possible states, and we follow the calculation of Shea and Ackers for  $f_{RM}(x_2, y_2)$  and  $f_R(x_2, y_2)$  [36] and Arkin *et. al.* for  $f_{RE}(z_4)$  [25] (see Supplementary Text S1).  $f_{RM}$  has two modes of transcription denoted as basal and activated depending on  $(x_2, y_2)$ . Response of  $f_{aQ}$  is a first order Hill function which is

$$f_{aQ}(z_4) = \frac{c_p^{aQ} z_4}{1 + c_p^{aQ} z_4}. \quad (5)$$

For stochastic simulations, we chose two parameter sets which lead to a transiently and asymptotically divergent lysis-lysogeny decision switch. Parameter values for the transiently divergent and asymptotically divergent cases are listed in Table 1. To calculate the fraction of lysogeny, we used at least 3,000 realizations of a stochastic model. Our simulations are based on Eq. (3) and are fully stochastic as implemented using the Gillespie algorithm [65] (see Supplementary Text S1 for details).

### Modeling gene dosage compensation

When gene dosage is compensated, the effective copy number, which is the fold change of transcription rate, is smaller than the

actual copy number. Here we assume the effective copy number scales as  $\mathcal{M}^\varepsilon$  where  $0 \leq \varepsilon \leq 1$ . When  $\varepsilon = 0$ , the system is completely compensated without any copy number dependence. On the contrary, when  $\varepsilon = 1$ , transcription rate is linearly proportional to the copy number. The experimental data (Fig. 5 (A)) supports that  $\varepsilon$  is between 0.4 and 0.6. For stochastic simulations, we replace all the terms of  $\mathcal{M}$  in Eq. (3) with  $\mathcal{M}^\varepsilon$ , and set  $\varepsilon = 0.5$ .

### Supporting Information

**Text S1** Additional details on methods. (PDF)

### Acknowledgments

We thank Ido Golding and Lanying Zeng for sharing experimental data and for their comments on the manuscript.

### Author Contributions

Conceived and designed the experiments: RIJ JSW. Performed the experiments: RIJ. Analyzed the data: RIJ JSW. Contributed reagents/materials/analysis tools: RIJ JSW. Wrote the paper: RIJ JSW.

### References

- Solomon JM, Grossman AD (1996) Who's competent and when: regulation of natural genetic competence in bacteria. *Trends Genet* 12: 150–155.
- Stragier P, Losick R (1996) Molecular genetics of sporulation in *Bacillus subtilis*. *Annu Rev Gen* 30: 297–341.
- Balaban NQ, Merrin J, Chait R, Kowalik L, Leibler S (2004) Bacterial persistence as a phenotypic switch. *Science* 305: 1622–1625.
- Ptashne M (2004) A genetic switch. Phage lambda revisited. Cold Spring Harbor, NY: Cold Spring Harbor Laboratory Press, 3rd edition.
- Morrison SJ, Shar NM (1997) Regulatory mechanisms in stem cell biology. *Cell* 88: 287–298.
- McAdams HH, Arkin A (1999) It's a noisy business! Genetic regulation at the nanomolar scale. *Trends Genet* 15: 65–69.
- Kaern M, Elston TC, Blake WJ, Collins JJ (2005) Stochasticity in gene expression: from theories to phenotypes. *Nat Rev Genet* 6: 451–464.
- Kaufmann BB, van Oudenaarden A (2007) Stochastic gene expression: from single molecules to the proteome. *Curr Opin Genet Dev* 17: 107–112.
- Spudich JL, Koshland Jr. DE (1976) Non-genetic individuality: chance in the single cell. *Nature* 262: 467–471.
- Elowitz MB, Levine AJ, Siggia ED, Swain PS (2002) Stochastic gene expression in a single cell. *Science* 297: 1183–1186.
- Maamar H, Raj A, Dubnau D (2007) Noise in gene expression determines cell in *Bacillus subtilis*. *Science* 317: 526–529.
- Maamar H, Dubnau D (2005) Bistability in the *Bacillus subtilis* K-state (competence) system requires a positive feedback loop. *Mol Microbiol* 56: 615–624.
- Losick R, Desplan C (2008) Stochasticity and cell fate. *Science* 320: 65–68.
- Xiong W, Ferrell Jr. JE (2003) A positive-feedback-based bistable 'memory module' that governs a cell fate decision. *Nature* 426: 460–465.
- Weinberger L, Dar RD, Simpson ML (2008) Transient-mediated fate determination in a transcriptional circuit of HIV. *Nat Gen* 40: 466–470.
- Alon U (2007) An introduction to systems biology: Design principles of biological circuits. Boca Raton, FL: Chapman & Hall.
- Darling DA, Siegert AJF (1953) The first passage problem for a continuous Markov process. *Ann Math Statist* 4: 624–639.
- Redner S (2001) A guide to first-passage processes. Cambridge, UK: Cambridge University Press, 1st edition.
- Hendrix RW, Roberts JW, Stahl FW, Weisberg RA (1983) Lambda II. Cold Spring Harbor, NY: Cold Spring Harbor Laboratory Press.
- Dodd IB, Shearwin KE, Egan JB (2005) Revisited gene regulation in bacteriophage  $\lambda$ . *Curr Opin Genes Dev* 15: 145–152.
- Oppenheim AB, Kobiler O, Stavans J, Court DL, Adhya S (2005) Switches in bacteriophage lambda development. *Annu Rev Genet* 39: 409–429.
- Court DL, Oppenheim AB, Adhya SL (2007) A new look at bacteriophage  $\lambda$  genetic networks. *J Bacteriol* 189: 298–304.
- Kourilsky P (1973) Lysogenization by bacteriophage lambda. I. Multiple infection and the lysogenic response. *Mol Gen Genet* 122: 183–195.
- Kobiler O, Rokney A, Fredman N, Court DL, Stravans J, et al. (2005) Quantitative kinetic analysis of the bacteriophage  $\lambda$  genetic network. *Proc Natl Acad Sci USA* 102: 4470–4475.
- Arkin A, Ross J, McAdams HH (1998) Stochastic kinetic analysis of developmental pathway bifurcation in phage  $\lambda$ -infected *Escherichia coli* cells. *Genetics* 149: 1633–1648.
- Singh A, Weinberger LS (2009) Stochastic gene expression as a molecular switch for viral latency. *Curr Opin Microbiol* 12: 460–466.
- St Pierre F, Endy D (2008) Determination of cell fate selection during phage lambda infection. *Proc Natl Acad Sci USA* 105: 20705–20710.
- Weitz JS, Mileyko Y, Joh RI, Voit EO (2008) Collective decisions among bacterial viruses. *Biophys J* 95: 2673–2680.
- Zeng L, Skinner SO, Zong C, Slippy J, Feiss M, et al. (2010) Decision making at a subcellular level determines the outcome of bacteriophage infection. *Cell* 141: 682–691.
- Aurell E, Sneppen K (2002) Epigenetics as a first exit problem. *Phys Rev Lett* 88: 048101.
- Hochschild A, Ptashne M (1984) Cooperative binding of lambda repressors to sites separated by integral turns of the DNA helix. *Cell* 44: 681–687.
- Griffith J, Hochschild A, Ptashne M (1986) DNA loops induced by cooperative binding of  $\lambda$  repressor. *Nature* 322: 750–752.
- Babi c' AC, Little JW (2007) Cooperative DNA binding by CI repressor is dispensable in a phage  $\lambda$  variant. *Proc Natl Acad Sci USA* 104: 17741–17746.
- Morelli MJ, ten Wolde PR, Allen RJ (2009) DNA looping provides stability and robustness to the bacteriophage  $\lambda$  switch. *Proc Natl Acad Sci USA* 106: 8101–8106.
- Ackers GK, Shea MA (1982) Quantitative model for gene regulation by lambda phage repressor. *Proc Natl Acad Sci USA* 79: 1129–1133.
- Shea MA, Ackers GK (1985) The  $O_R$  control system of bacteriophage lambda. A physical-chemical model for gene regulation. *J Mol Biol* 181: 211–230.
- Terzi M, Levinthal C (1967) Effects of  $\lambda$ -phage infection on bacterial synthesis. *J Mol Biol* 26: 525–530.
- Howes WV (1965) Protein synthesis in *Escherichia coli*: a phage mediated interruption of translation. *Biochim Biophys Acta* 103: 711–713.
- Birchler JA, Riddle NC, Auger DL, Veitia RA (2005) Dosage balance in gene regulation: biological implications. *Trends Genet* 21: 219–226.
- Svenningsen SL, Tu KC, Bassler BL (2009) Gene dosage compensation calibrates four regulatory RNAs to control *Vibrio cholerae* quorum sensing. *EMBO J* 28: 429–439.
- Springer M, Weissman JS, Kirschner MW (2010) A general lack of compensation for gene dosage in yeast. *Mol Syst Biol* 6: 368.
- Gardner TS, Cantor CR, Collins JJ (2000) Construction of a genetic toggle switch in *Escherichia coli*. *Nature* 403: 339–342.
- Cherry JL, Adler FR (2000) How to make a biological switch. *J Theor Biol* 203: 117–133.
- Lipshtat A, Loinger A, Balaban NQ, Biham O (2006) Genetic toggle switch without cooperative binding. *Phys Rev Lett* 96: 188101.

45. Süel MB, Garcia-Ojalvo J, Liberman LM, Elowitz MB (2006) An excitable gene regulatory circuit induces transient cellular differentiation. *Nature* 440: 545–550.
46. Ziv E, Nemenman I, Wiggins CH (2007) Optimal signal processing in small stochastic biochemical networks. *PLoS ONE* 2: e1077.
47. Stewart FM, Levin BR (1984) The population biology of bacterial viruses: Why be temperate? *Theor Pop Biol* 26: 93–117.
48. Avlund M, Dodd IB, Semsey S, Sneppen K, Krishna S (2009) Why do phage play dice? *J Virol* 83: 11416–11420.
49. Veening J, Smits WK, Kulpers OP (2008) Bistability, epigenetics, and bet-hedging in bacteria. *Annu Rev Microbiol* 62: 193–210.
50. Gudej I, Weitz JS, Ferenci T, Horner-Devine MC, Marx CJ, et al. (2010) An integrative approach to understanding microbial diversity: from intracellular mechanisms to community structure. *Ecol Lett* 13: 1073–1084.
51. Perry GH, Dominy NJ, Claw KG, Lee AS, Fiegler H, et al. (2007) Diet and the evolution of human amylase gene copy number variation. *Nat Genet* 39: 1256–1260.
52. DeLuna A, Vetsigian K, Shores N, Hegreness M, Colon-Gonzalez M, et al. (2008) Exposing the fitness contribution of duplicated genes. *Nat Genet* 40: 676–681.
53. Mileyko Y, Joh RI, Weitz JS (2008) Small-scale copy number variation and large-scale changes in gene expression. *Proc Natl Acad Sci USA* 105: 16659–16664.
54. Schuster-Böckler B, Conrad D, Bateman A (2010) Dosage sensitivity shapes the evolution of copy-number varied regions. *PLoS ONE* 5: e9474.
55. Ben-Israel H, Kleinberger T (2002) Adenovirus and cell cycle control. *Front Biosci* 7: d1369–d1395.
56. Sherratt DJ (2003) Bacterial chromosome dynamics. *Science* 301: 780–785.
57. Russell JH, Keiler KC (2009) Subcellular localization of a bacterial regulatory RNA. *Proc Natl Acad Sci USA* 106: 16405–16409.
58. Thanbichler M, Shapiro L (2008) Getting organized-how bacterial cells move proteins and DNA. *Nat Rev Microbiol* 6: 28–40.
59. Edgar R, Rokney A, Feeney M, Semsey S, Kessel M, et al. (2008) Bacteriophage infection is targeted to cellular poles. *Mol Microbiol* 68: 1107–1116.
60. Marshall CJ (1995) Specificity of receptor tyrosine kinase signaling: transient versus sustained extracellular signal-regulated kinase activation. *Cell* 80: 179–185.
61. Ebisuya M, Kondoh K, Nishida E (2005) The duration, magnitude and compartmentalization of EKR MAP kinase activity: mechanisms for providing signaling specificity. *J Cell Sci* 118: 2997–3002.
62. Mangan S, Itzkovitz S, Zaslaver A, Alon U (2006) The incoherent feed-forward loop accelerates the response-time of the gal system of *Escherichia coli*. *J Mol Biol* 356: 1073–1081.
63. Parua PK, Datta AB, Parrack P (2010) Specific hydrophobic residues in the  $\alpha$  4 helix of  $\lambda$  CII are crucial for maintaining its tetrameric structure and directing the lysogenic choice. *J Gen Virol* 91: 306–312.
64. Révet B, von Wilcken-Bergmann B, Bessert H, Barker A, Muller-Hill B (1999) Four dimers of  $\lambda$  repressor bound to two suitably spaced pairs of lambda operators form octamers and DNA loops over large distances. *Curr Biol* 9: 151–154.
65. Gillespie DT (1977) Exact stochastic simulation of coupled chemical reactions. *J Phys Chem* 82: 2340–2361.
66. Hawley DK, Johnson AD, McClure WR (1985) Functional and physical characterization of transcription initiation complexes in the bacteriophage  $\lambda$   $O_R$  region. *J Biol Chem* 260: 8618–8626.
67. Pakula AA, Young VB, Sauer RT (1986) Bacteriophage lambda *cro* mutations: effects on activity and intracellular degradation. *Proc Natl Acad Sci USA* 83: 8829–8833.
68. Kobiler O, Koby S, Teff D, Court D, Oppenheim AB (2002) The phage  $\lambda$  CII transcriptional activator carries a C-terminal domain signaling for rapid proteolysis. *Proc Natl Acad Sci USA* 99: 14964–14969.
69. Court D, Crombrughe B, Adhya S, Gottesman M (1980) Bacteriophage lambda Hin function II. Enhanced stability of lambda messenger RNA. *J Mol Biol* 138: 731–743.
70. Hwang JJ, Brosn S, Gussin GN (1988) Characterization of a doubly mutant derivative of the lambda  $P_{RM}$  promoter. Effects of mutations on activation of  $P_{RM}$ . *J Mol Biol* 200: 695–708.
71. Sauer RT, Pabo CO, Meyer BJ, Ptashne M, Backman KC (1979) Regulatory functions of the lambda. Repressor reside in the amino-terminal domain. *Nature* 279: 396–400.
72. Burz D, Becket D, Benson N, Ackers GK (1994) Self-assembly of bacteriophage  $\lambda$  CI repressor: effects of single-site mutations on the monomer-dimer equilibrium. *Biochemistry* 33: 8399–8405.
73. Jana R, Hazbun TR, Mollah AK, Mossing MC (1997) A folded monomeric intermediate in the formation of lambda Cro dimer-dna complexes. *J Mol Biol* 273: 402–416.
74. Darling PJ, Holt JM, Ackers GK (2000) Couple energetics of  $\lambda$  *cro* repressor self-assembly and site-specific DNA operator binding. I: Analysis of *cro* dimerization from nanomolar to micromolar concentrations. *Biochemistry* 39: 11500–11507.
75. Levine E, Hwa T (2008) Small RNAs establish gene expression thresholds. *Curr Opin Microbiol* 11: 574–579.
