# Supplementary material for: To Lyse or Not to Lyse: Transient-Mediated Stochastic Fate Determination in Cells Infected by Bacteriophages
Source: PLOS journal article supplement (doi:10.1371/journal.pcbi.1002006), 2011-03-10
Supplement: S1 (10.1371/journal.pcbi.1002006.s001) [file journal.pcbi.1002006.s001]

301 Moved Permanently

# Moved Permanently

The document has moved here.

---

Apache Server at www.ploscompbiol.org Port 80
